# Supplementary material for: A Comprehensive Approach to Develop a Hydrological Model for the Simulation of All the Important Hydrological Components: The Case of the Three-River Headwater Region, China
Source: MDPI journal article supplement (doi:10.3390/w14182778), 2022-09-07
Supplement: s1 [file s1]

Archive with 1 entries (1 files):
- water-1848911-supplementary.pdf
